# Supplementary material
Source: PubMed Central journal article supplement (PMC7616912)
Supplement: EMS98732-supplement-Supporting_information.pdf [file EMS98732-supplement-Supporting_information.pdf]

# SUPPORTING INFORMATION

## Nanoparticles for Multimodal Antivascular Therapeutics: Dual Drug Release, Photothermal and Photodynamic Therapy.

Juan L. Paris, Gonzalo Villaverde, Sergio Gómez-Graña and María Vallet-Regí

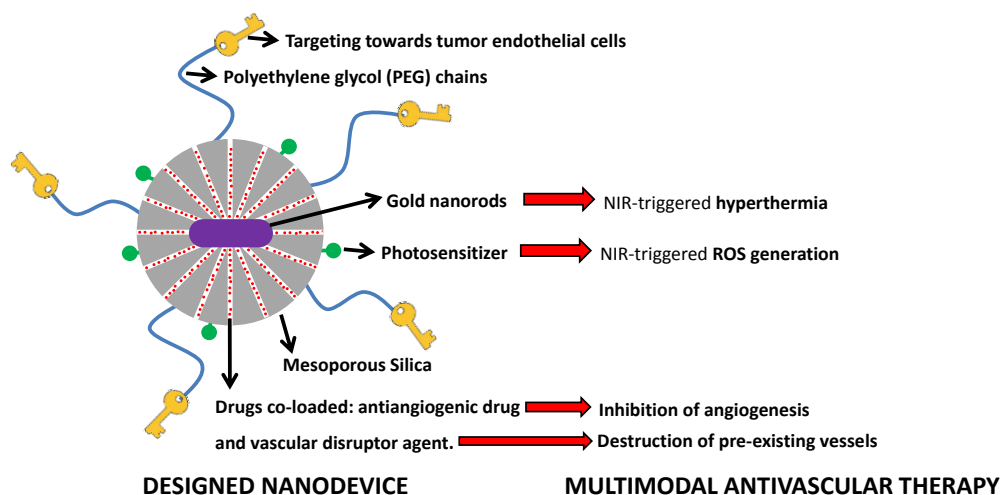

Figure S1. Schematic representation of the material designed in this work.

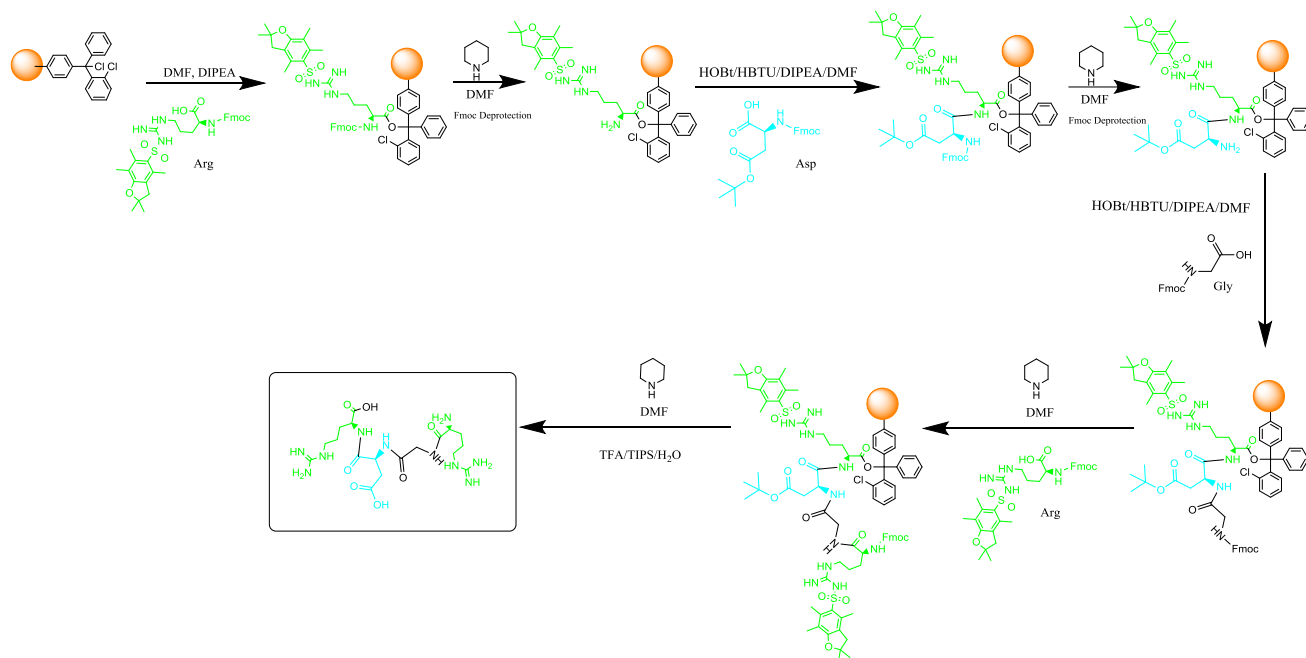

Scheme S1. Scheme of synthesis of RGDR peptide by solid-phase methodology.

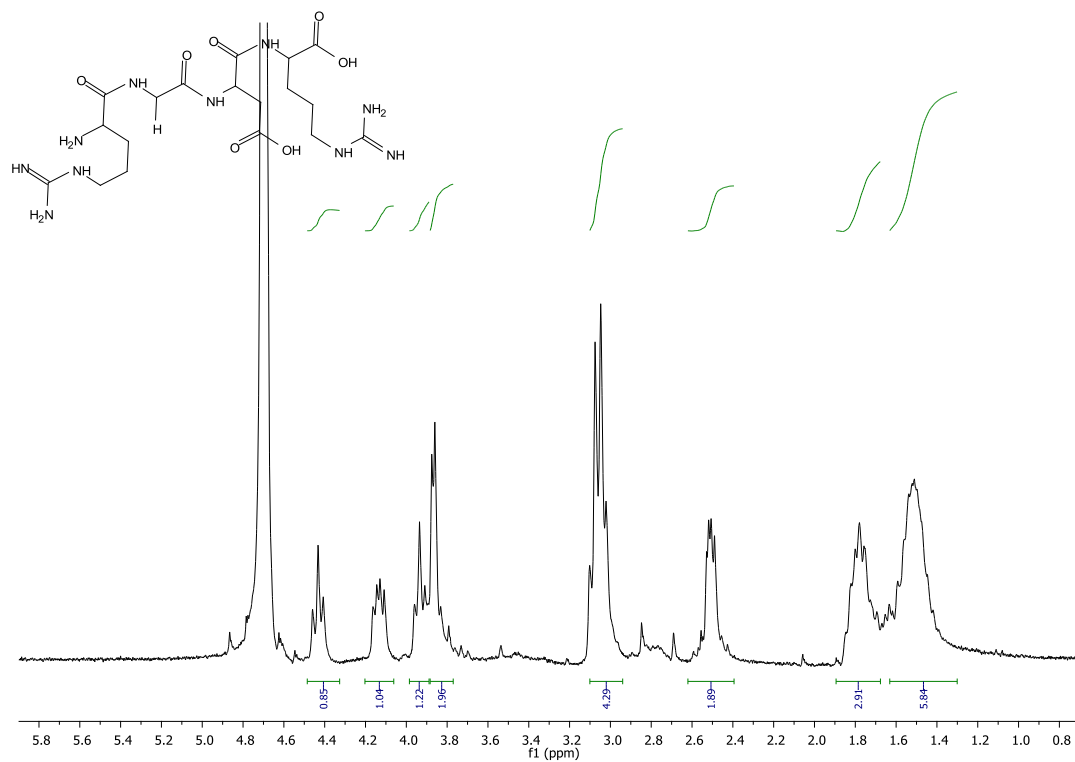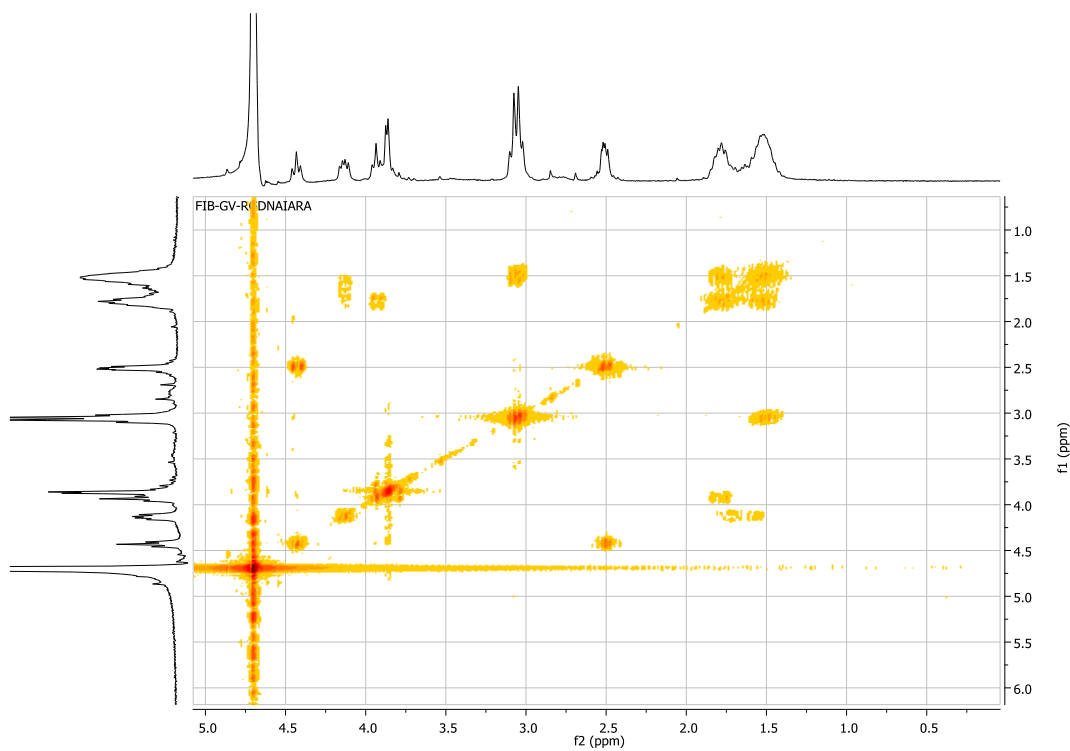

$^1\text{H}$  NMR (250 MHz,  $\text{D}_2\text{O}$ )  $\delta$  4.43 (t,  $J = 6.6$  Hz, 1H, CH, Asp), 4.14 (dd,  $J = 8.8, 5.0$  Hz, 1H, CH, Arg), 3.94 (t,  $J = 6.3$  Hz, 1H, CH, Arg), 3.88 – 3.77 (m, 2H,  $\text{CH}_2$ , Gly), 3.13 – 2.94 (m, 4H, 2x $\text{CH}_2$ , 2xArg), 2.52 (dd,  $J = 9.7, 6.7$  Hz, 2H,  $\text{CH}_2$ , Asp), 1.89 – 1.68 (m, 4H, 2x $\text{CH}_2$ , 2xArg), 1.63 – 1.30 (m, 4H, 2x $\text{CH}_2$ , 2xArg).

**Figure S2.**  $^1\text{H}$  NMR spectra of the RGDR peptide prepared.

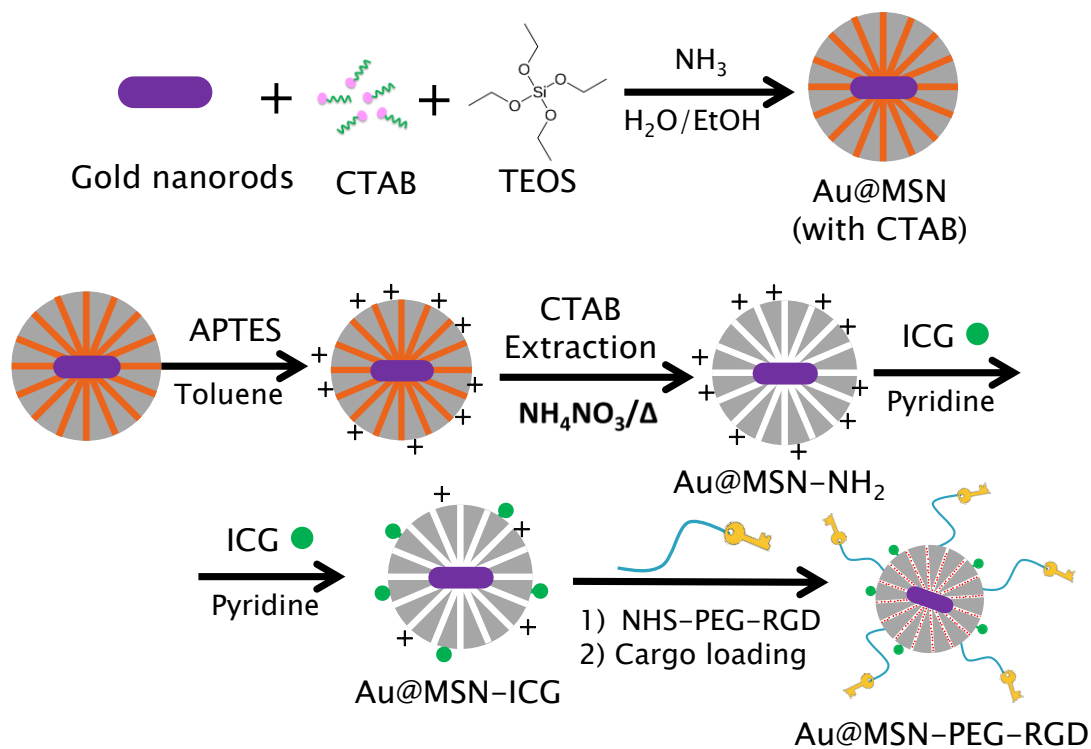

**Scheme S2.** Synthetic scheme to prepare the nanoparticles employed in this work.

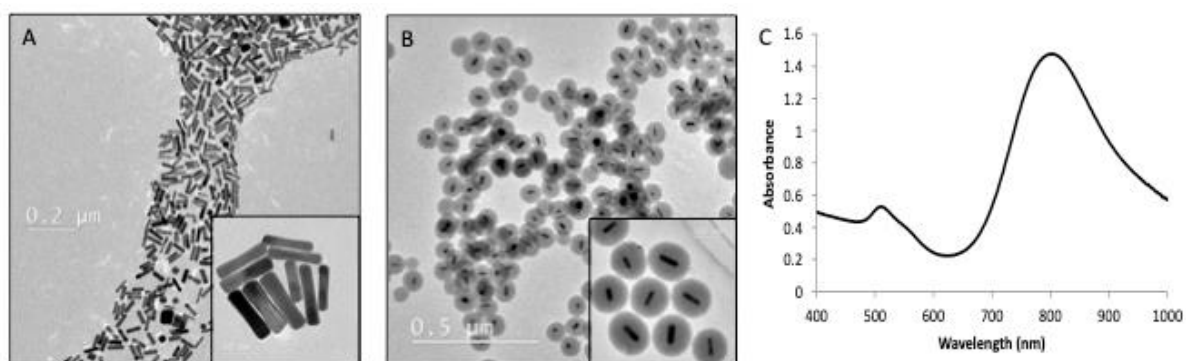

**Figure S3.** TEM micrograph of GNRs (A); TEM micrograph of the mesoporous silica coated GNRs (B), UV-VIS-NIR absorption spectrum of a suspension of the prepared GNRs (C).

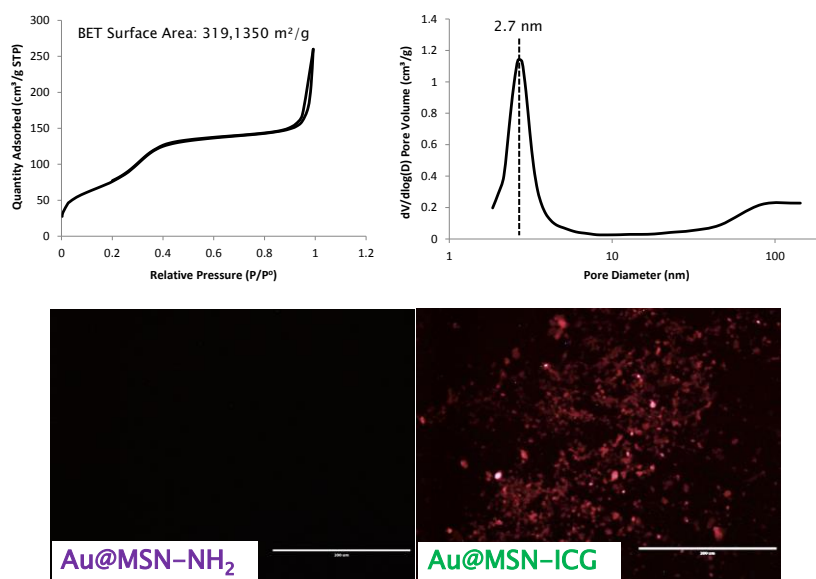

**Figure S4.** N<sub>2</sub> adsorption results from Au@MSN (top), NIR fluorescence microscopy images from Au@MSN-NH<sub>2</sub> and Au@MSN-ICG (bottom).

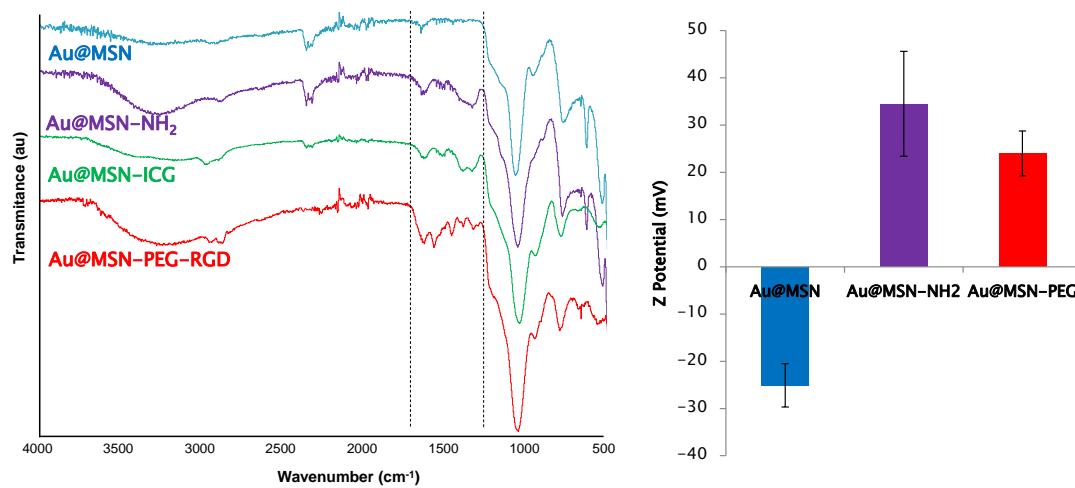

**Figure S5.** FTIR spectra (left) and Z Potential values (right) from different nanoparticles prepared. Data are Means $\pm$ SD.

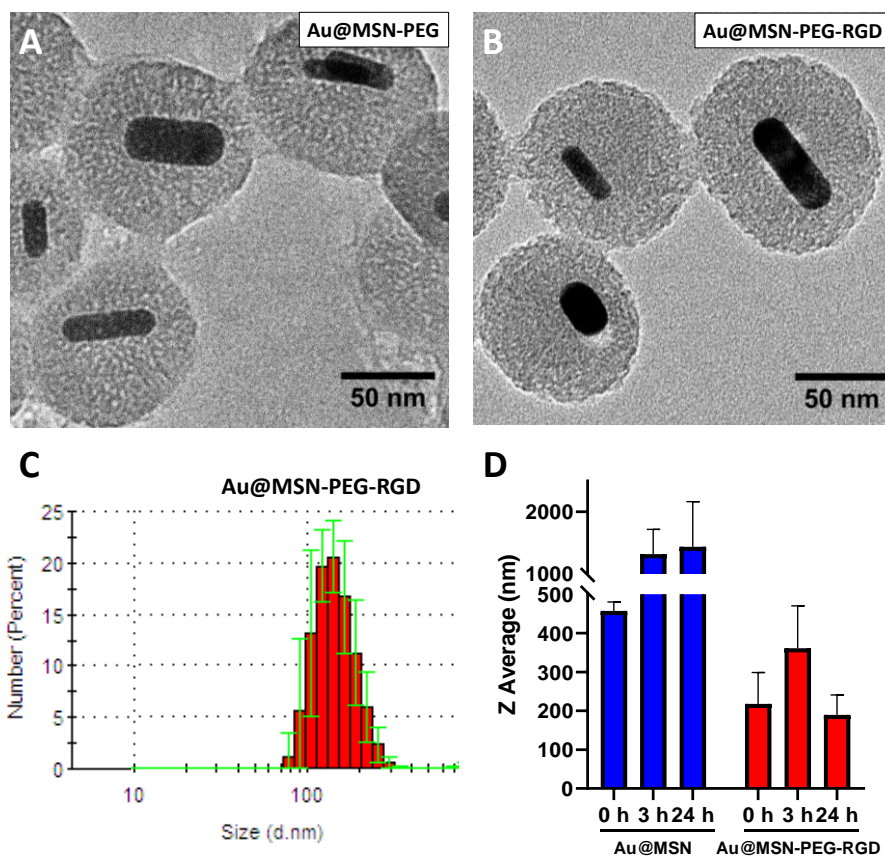

**Figure S6.** TEM micrographs of Au@MSN-PEG (A) and Au@MSN-PEG-RGD (B). Size distribution of Au@MSN-PEG-RGD determined by DLS (C), and suspension stability results of Au@MSN and Au@MSN-PEG-RGD in 10% Fetal Bovine Serum obtained by DLS (D).

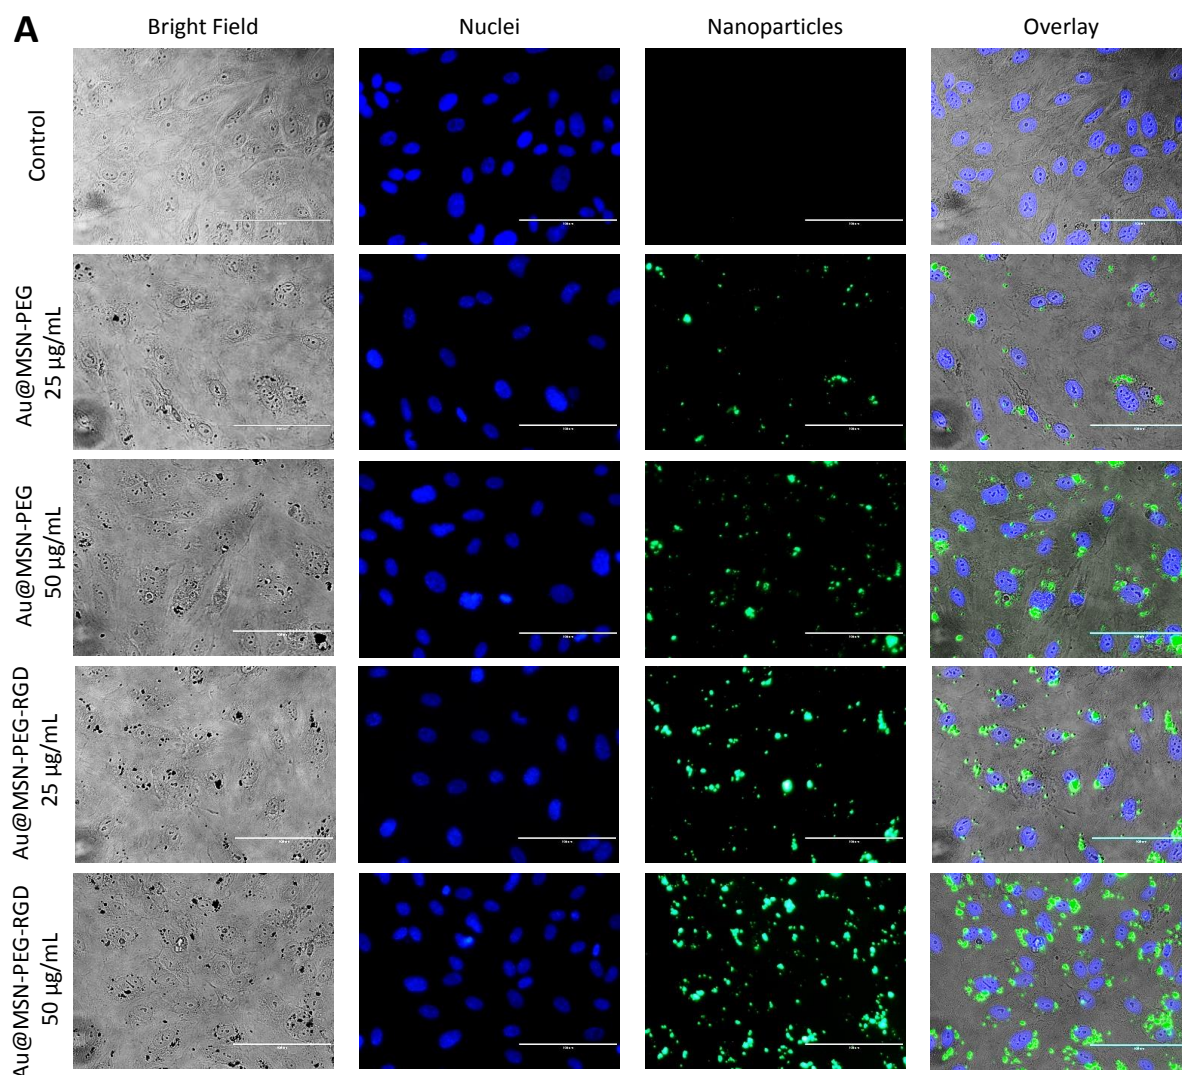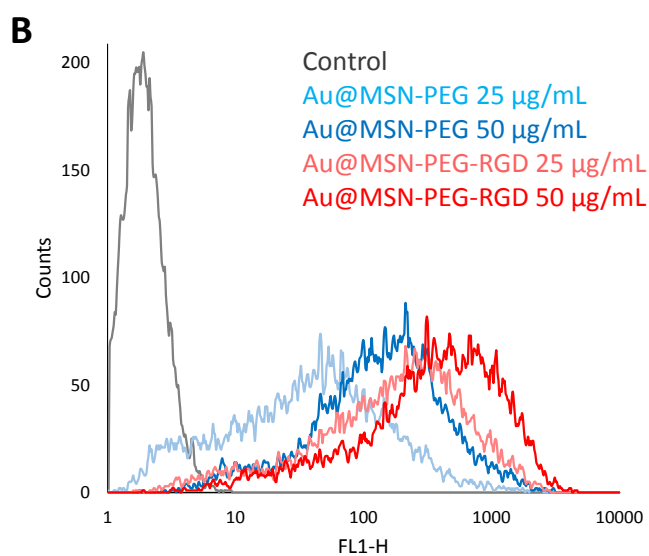

**Figure S7.** Nanoparticle uptake experiments of FITC-labeled Au@MSN-PEG and Au@MSN-PEG-RGD by HUVEC. A) Fluorescence microscopy images (bright field, blue fluorescence for cell nuclei stained with DAPI, green fluorescence for FITC-labeled nanoparticles and overlay of all the previous), B) Fluorescence intensity histograms obtained by flow cytometry.



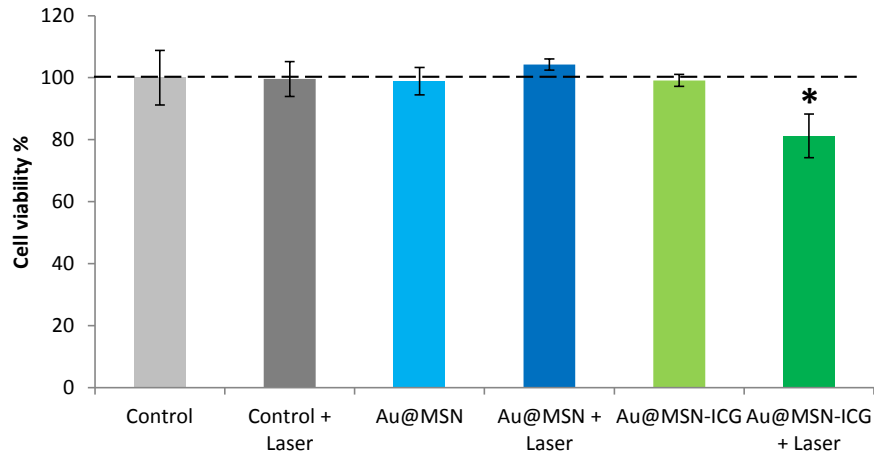

**Figure S8.** Cell viability data (measured by Alamar Blue assay) from HUVEC cells cultured with Au@MSN and Au@MSN-ICG without and with 5 min NIR laser irradiation (50  $\mu\text{g}/\text{mL}$  nanoparticle suspension, 1 mL per well). Data are Means  $\pm$ SD, N=3, \* $p$ <0.05.

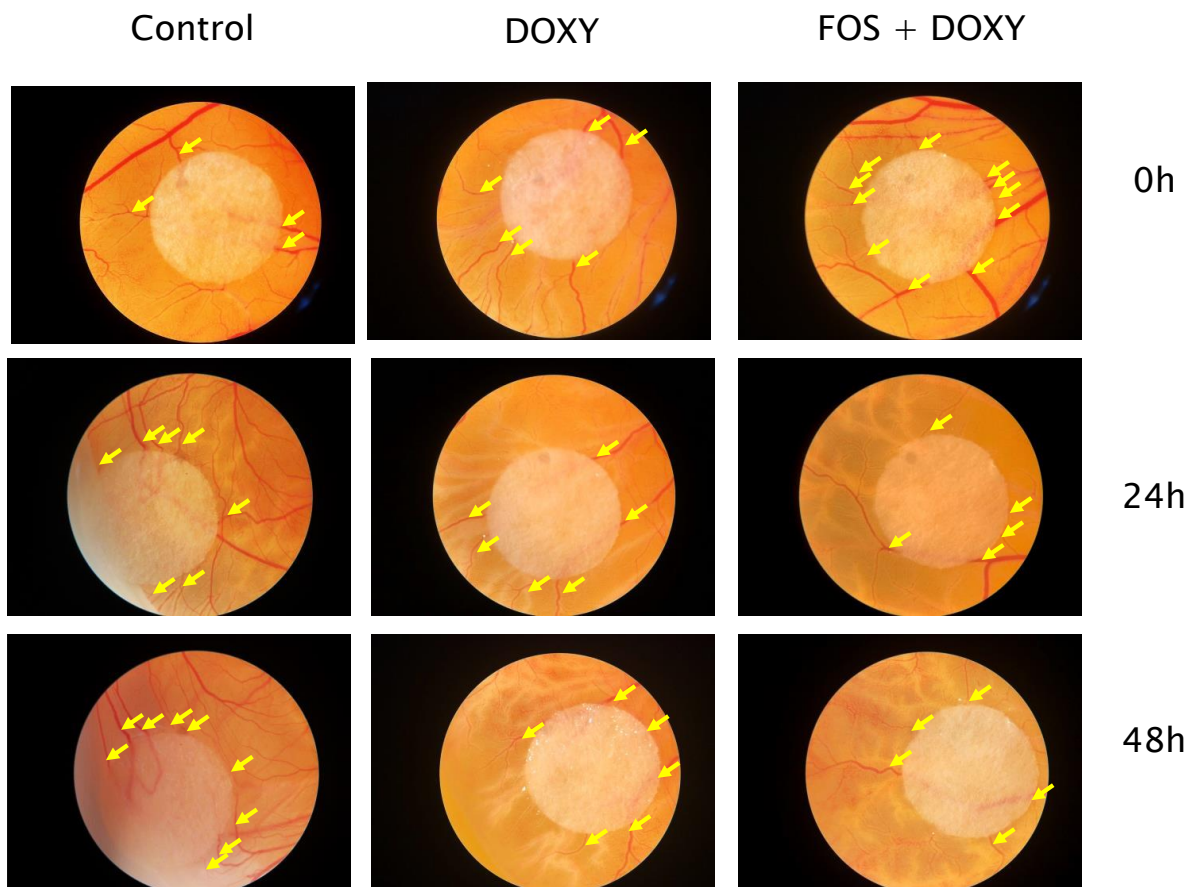

**Figure S9.** Stereomicroscopy images at different time points from CAM vasculature treated with cellulose disks soaked in the release media from DOXY-loaded and dual drug-loaded nanoparticles.
